# Supplementary material for: Comparative Study of Several Machine Learning Algorithms for Classification of Unifloral Honeys
Source: Foods. 2021 Jul 3;10(7):1543. doi: 10.3390/foods10071543 (PMC8303996; doi:10.3390/foods10071543)
Supplement: Supplementary file 1 [file foods-10-01543-s001.zip › Table S1.pdf]

**Table S1.** Mean values for the predictor variables in the two clusters obtained by k-means.

| Variable                                            | Cluster 1 | Cluster 2 |
|-----------------------------------------------------|-----------|-----------|
| Water content (%)                                   | 17.35571  | 16.81667  |
| Electrical conductivity ( $\mu\text{S}/\text{cm}$ ) | 277.7537  | 961.8333  |
| pH                                                  | 3.947429  | 4.524667  |
| Fructose content (%)                                | 37.69571  | 35.87333  |
| Glucose content (%)                                 | 31.82286  | 27.59667  |
| Sucrose content (%)                                 | 1.541585  | 0.1422333 |
| Maltose content (%)                                 | 3.779000  | 4.345667  |
| Kojibiose content (%)                               | 1.998429  | 3.086333  |
| Isomaltose content (%)                              | 0.6707143 | 1.3756667 |
| F/G ratio                                           | 1.190089  | 1.304986  |
| G/W ratio                                           | 1.849119  | 1.643134  |
| x                                                   | 0.4270286 | 0.6124667 |
| y                                                   | 0.4297714 | 0.3766333 |
| L                                                   | 51.23211  | 6.43750   |
