# Supplementary material for: Comparative Study of Several Machine Learning Algorithms for Classification of Unifloral Honeys
Source: Foods. 2021 Jul 3;10(7):1543. doi: 10.3390/foods10071543 (PMC8303996; doi:10.3390/foods10071543)
Supplement: Supplementary file 1 [file foods-10-01543-s001.zip › Table S2.pdf]

**Table S2.** Confusion matrixes obtained with all honeys in the data set without splitting into training and test set using 10-fold cross-validation.

PLS

|            | Reference |            |        |         |          |          |           |
|------------|-----------|------------|--------|---------|----------|----------|-----------|
| Prediction | Citrus    | Eucalyptus | Forest | Heather | Lavender | Rosemary | Sunflower |
| Citrus     | 15        | 0          | 0      | 0       | 1        | 12       | 0         |
| Eucalyptus | 0         | 8          | 0      | 0       | 4        | 0        | 0         |
| Forest     | 0         | 2          | 16     | 0       | 2        | 0        | 0         |
| Heather    | 0         | 0          | 0      | 13      | 0        | 0        | 0         |
| Lavender   | 0         | 0          | 0      | 0       | 3        | 0        | 0         |
| Rosemary   | 0         | 0          | 0      | 0       | 0        | 0        | 0         |
| Sunflower  | 1         | 4          | 0      | 0       | 4        | 1        | 14        |

C5.0 tree

|            | Reference |            |        |         |          |          |           |
|------------|-----------|------------|--------|---------|----------|----------|-----------|
| Prediction | Citrus    | Eucalyptus | Forest | Heather | Lavender | Rosemary | Sunflower |
| Citrus     | 15        | 0          | 0      | 0       | 0        | 2        | 0         |
| Eucalyptus | 0         | 11         | 0      | 0       | 0        | 0        | 0         |
| Forest     | 0         | 0          | 16     | 0       | 0        | 0        | 0         |
| Heather    | 0         | 0          | 0      | 13      | 0        | 0        | 0         |
| Lavender   | 0         | 3          | 0      | 0       | 11       | 1        | 0         |
| Rosemary   | 0         | 0          | 0      | 0       | 0        | 10       | 0         |
| Sunflower  | 1         | 0          | 0      | 0       | 3        | 0        | 14        |

PAM

|            | Reference |            |        |         |          |          |           |
|------------|-----------|------------|--------|---------|----------|----------|-----------|
| Prediction | Citrus    | Eucalyptus | Forest | Heather | Lavender | Rosemary | Sunflower |
| Citrus     | 14        | 0          | 0      | 0       | 0        | 2        | 0         |
| Eucalyptus | 0         | 13         | 0      | 0       | 0        | 0        | 0         |
| Forest     | 0         | 0          | 16     | 0       | 0        | 0        | 0         |
| Heather    | 0         | 0          | 0      | 13      | 0        | 0        | 0         |
| Lavender   | 0         | 1          | 0      | 0       | 10       | 0        | 0         |
| Rosemary   | 2         | 0          | 0      | 0       | 0        | 11       | 0         |
| Sunflower  | 0         | 0          | 0      | 0       | 4        | 0        | 14        |

KKNN

|            | Reference |            |        |         |          |          |           |
|------------|-----------|------------|--------|---------|----------|----------|-----------|
| Prediction | Citrus    | Eucalyptus | Forest | Heather | Lavender | Rosemary | Sunflower |
| Citrus     | 15        | 0          | 0      | 0       | 0        | 2        | 0         |
| Eucalyptus | 0         | 11         | 0      | 0       | 0        | 0        | 0         |
| Forest     | 0         | 0          | 16     | 0       | 0        | 0        | 0         |
| Heather    | 0         | 0          | 0      | 13      | 0        | 0        | 0         |
| Lavender   | 0         | 3          | 0      | 0       | 11       | 1        | 0         |
| Rosemary   | 0         | 0          | 0      | 0       | 0        | 10       | 0         |
| Sunflower  | 1         | 0          | 0      | 0       | 3        | 0        | 14        |

Table S2. Continued

PDA

|            | Reference |            |        |         |          |          |           |
|------------|-----------|------------|--------|---------|----------|----------|-----------|
| Prediction | Citrus    | Eucalyptus | Forest | Heather | Lavender | Rosemary | Sunflower |
| Citrus     | 16        | 0          | 0      | 0       | 0        | 1        | 0         |
| Eucalyptus | 0         | 14         | 0      | 0       | 0        | 0        | 0         |
| Forest     | 0         | 0          | 16     | 1       | 0        | 0        | 0         |
| Heather    | 0         | 0          | 0      | 12      | 0        | 0        | 0         |
| Lavender   | 0         | 0          | 0      | 0       | 13       | 0        | 0         |
| Rosemary   | 0         | 0          | 0      | 0       | 0        | 12       | 0         |
| Sunflower  | 0         | 0          | 0      | 0       | 1        | 0        | 14        |

SDA

|            | Reference |            |        |         |          |          |           |
|------------|-----------|------------|--------|---------|----------|----------|-----------|
| Prediction | Citrus    | Eucalyptus | Forest | Heather | Lavender | Rosemary | Sunflower |
| Citrus     | 13        | 0          | 0      | 0       | 0        | 2        | 0         |
| Eucalyptus | 0         | 14         | 0      | 0       | 0        | 0        | 0         |
| Forest     | 0         | 0          | 16     | 1       | 0        | 0        | 0         |
| Heather    | 0         | 0          | 0      | 12      | 0        | 0        | 0         |
| Lavender   | 1         | 0          | 0      | 0       | 13       | 1        | 0         |
| Rosemary   | 2         | 0          | 0      | 0       | 0        | 10       | 0         |
| Sunflower  | 0         | 0          | 0      | 0       | 1        | 0        | 14        |

ET

|            | Reference |            |        |         |          |          |           |
|------------|-----------|------------|--------|---------|----------|----------|-----------|
| Prediction | Citrus    | Eucalyptus | Forest | Heather | Lavender | Rosemary | Sunflower |
| Citrus     | 16        | 0          | 0      | 0       | 0        | 0        | 0         |
| Eucalyptus | 0         | 14         | 0      | 0       | 0        | 0        | 0         |
| Forest     | 0         | 0          | 16     | 0       | 0        | 0        | 0         |
| Heather    | 0         | 0          | 0      | 13      | 0        | 0        | 0         |
| Lavender   | 0         | 0          | 0      | 0       | 14       | 0        | 0         |
| Rosemary   | 0         | 0          | 0      | 0       | 0        | 13       | 0         |
| Sunflower  | 0         | 0          | 0      | 0       | 0        | 0        | 14        |

HDDA

|            | Reference |            |        |         |          |          |           |
|------------|-----------|------------|--------|---------|----------|----------|-----------|
| Prediction | Citrus    | Eucalyptus | Forest | Heather | Lavender | Rosemary | Sunflower |
| Citrus     | 13        | 0          | 0      | 0       | 0        | 2        | 0         |
| Eucalyptus | 0         | 11         | 0      | 0       | 2        | 0        | 0         |
| Forest     | 0         | 0          | 16     | 1       | 0        | 0        | 0         |
| Heather    | 0         | 0          | 0      | 12      | 0        | 0        | 0         |
| Lavender   | 1         | 3          | 0      | 0       | 11       | 1        | 0         |
| Rosemary   | 2         | 0          | 0      | 0       | 0        | 10       | 0         |
| Sunflower  | 0         | 0          | 0      | 0       | 1        | 0        | 14        |

Table S2. Continued

ANN

|            | Reference |            |        |         |          |          |           |
|------------|-----------|------------|--------|---------|----------|----------|-----------|
| Prediction | Citrus    | Eucalyptus | Forest | Heather | Lavender | Rosemary | Sunflower |
| Citrus     | 15        | 0          | 0      | 0       | 0        | 1        | 0         |
| Eucalyptus | 0         | 14         | 0      | 0       | 0        | 0        | 0         |
| Forest     | 0         | 0          | 16     | 0       | 0        | 0        | 0         |
| Heather    | 0         | 0          | 0      | 13      | 0        | 0        | 0         |
| Lavender   | 0         | 0          | 0      | 0       | 13       | 0        | 0         |
| Rosemary   | 1         | 0          | 0      | 0       | 0        | 12       | 0         |
| Sunflower  | 0         | 0          | 0      | 0       | 1        | 0        | 14        |

RF

|            | Reference |            |        |         |          |          |           |
|------------|-----------|------------|--------|---------|----------|----------|-----------|
| Prediction | Citrus    | Eucalyptus | Forest | Heather | Lavender | Rosemary | Sunflower |
| Citrus     | 16        | 0          | 0      | 0       | 0        | 0        | 0         |
| Eucalyptus | 0         | 14         | 0      | 0       | 0        | 0        | 0         |
| Forest     | 0         | 0          | 16     | 0       | 0        | 0        | 0         |
| Heather    | 0         | 0          | 0      | 13      | 0        | 0        | 0         |
| Lavender   | 0         | 0          | 0      | 0       | 14       | 0        | 0         |
| Rosemary   | 0         | 0          | 0      | 0       | 0        | 13       | 0         |
| Sunflower  | 0         | 0          | 0      | 0       | 0        | 0        | 14        |

SVM<sub>L</sub>

|            | Reference |            |        |         |          |          |           |
|------------|-----------|------------|--------|---------|----------|----------|-----------|
| Prediction | Citrus    | Eucalyptus | Forest | Heather | Lavender | Rosemary | Sunflower |
| Citrus     | 11        | 0          | 0      | 0       | 0        | 3        | 0         |
| Eucalyptus | 0         | 14         | 0      | 1       | 6        | 0        | 1         |
| Forest     | 0         | 0          | 16     | 7       | 0        | 0        | 0         |
| Heather    | 0         | 0          | 0      | 3       | 0        | 0        | 0         |
| Lavender   | 0         | 0          | 0      | 2       | 0        | 0        | 0         |
| Rosemary   | 5         | 0          | 0      | 0       | 8        | 10       | 11        |
| Sunflower  | 0         | 0          | 0      | 0       | 0        | 0        | 2         |

SVM<sub>R</sub>

|            | Reference |            |        |         |          |          |           |
|------------|-----------|------------|--------|---------|----------|----------|-----------|
| Prediction | Citrus    | Eucalyptus | Forest | Heather | Lavender | Rosemary | Sunflower |
| Citrus     | 8         | 0          | 0      | 0       | 0        | 2        | 0         |
| Eucalyptus | 0         | 13         | 0      | 0       | 5        | 1        | 1         |
| Forest     | 0         | 0          | 16     | 0       | 1        | 0        | 0         |
| Heather    | 0         | 0          | 0      | 10      | 0        | 0        | 0         |
| Lavender   | 0         | 0          | 0      | 3       | 0        | 0        | 0         |
| Rosemary   | 8         | 1          | 0      | 0       | 7        | 10       | 4         |
| Sunflower  | 0         | 0          | 0      | 0       | 1        | 0        | 9         |

XGBoost

|            | Reference |            |        |         |          |          |           |
|------------|-----------|------------|--------|---------|----------|----------|-----------|
| Prediction | Citrus    | Eucalyptus | Forest | Heather | Lavender | Rosemary | Sunflower |
| Citrus     | 16        | 0          | 0      | 0       | 0        | 0        | 0         |
| Eucalyptus | 0         | 14         | 0      | 0       | 0        | 0        | 0         |
| Forest     | 0         | 0          | 16     | 0       | 0        | 0        | 0         |
| Heather    | 0         | 0          | 0      | 13      | 0        | 0        | 0         |
| Lavender   | 0         | 0          | 0      | 0       | 14       | 0        | 0         |
| Rosemary   | 0         | 0          | 0      | 0       | 0        | 13       | 0         |
| Sunflower  | 0         | 0          | 0      | 0       | 0        | 0        | 14        |
